# Supplementary material for: Semaphorin-7A Is an Erythrocyte Receptor for P. falciparum Merozoite-Specific TRAP Homolog, MTRAP
Source: PubMed Central journal article supplement (PMC3499583; doi:10.1371/journal.ppat.1003031), 2012-11-15
Supplement: ppat.1003031.s002.pdf [file ppat.1003031.s002.pdf]

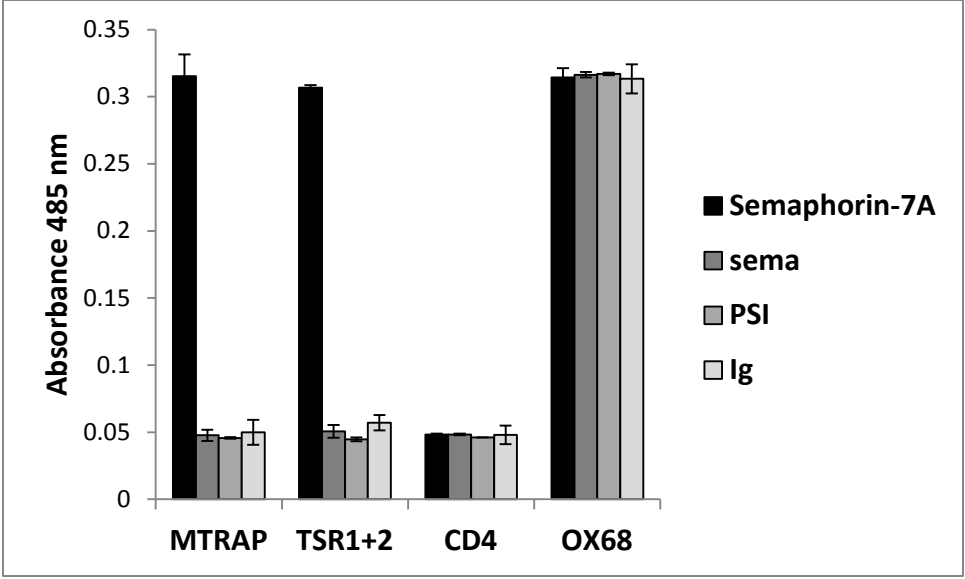

Figure S2
