# Supplementary material for: Semaphorin-7A Is an Erythrocyte Receptor for P. falciparum Merozoite-Specific TRAP Homolog, MTRAP
Source: PubMed Central journal article supplement (PMC3499583; doi:10.1371/journal.ppat.1003031), 2012-11-15
Supplement: ppat.1003031.s005.pdf [file ppat.1003031.s005.pdf]

| <b>SNP number</b> | <b>Nucleotide variant</b> | <b>Amino acid polymorphism</b> | <b>Location of polymorphism</b> |
|-------------------|---------------------------|--------------------------------|---------------------------------|
| rs16968733        | T>A                       | S115T                          | Sema                            |
| rs55637216        | G>A                       | R207Q                          | Sema                            |
| rs55757167        | C>A                       | Q457K                          | Sema                            |
| rs56204206        | G>A                       | R460H                          | Sema                            |
| rs56064164        | A>T                       | E473V                          | Sema                            |
| rs56100085        | G>T                       | R474L                          | Sema                            |
| rs56384187        | G>C                       | R475T                          | Sema                            |
| rs55696764        | A>C                       | Q530P                          | PSI                             |

**Table S2**
