# Supplementary material for: Semaphorin-7A Is an Erythrocyte Receptor for P. falciparum Merozoite-Specific TRAP Homolog, MTRAP
Source: PubMed Central journal article supplement (PMC3499583; doi:10.1371/journal.ppat.1003031), 2012-11-15
Supplement: ppat.1003031.s006.pdf [file ppat.1003031.s006.pdf]

| Experiment # | Ligand        | Analyte | $k_d$ ( $s^{-1}$ ) | Fit error | Mean ( $s^{-1}$ ) | SEM   | $t_{1/2}$ (s) |
|--------------|---------------|---------|--------------------|-----------|-------------------|-------|---------------|
| 1            | Semaphorin-7A | MTRAP   | 0.058              | 0.0003    | 0.056             | 0.003 | 12.38         |
| 2            | Semaphorin-7A | MTRAP   | 0.054              | 0.0003    |                   |       |               |
| 1            | S115T         | MTRAP   | 0.053              | 0.0005    | 0.050             | 0.004 | 13.86         |
| 2            | S115T         | MTRAP   | 0.047              | 0.0009    |                   |       |               |
| 1            | R207Q         | MTRAP   | 0.054              | 0.0005    | 0.050             | 0.006 | 14.00         |
| 2            | R207Q         | MTRAP   | 0.045              | 0.0007    |                   |       |               |
| 1            | Q457K         | MTRAP   | 0.053              | 0.0006    | 0.056             | 0.004 | 12.49         |
| 2            | Q457K         | MTRAP   | 0.058              | 0.005     |                   |       |               |
| 1            | R460H         | MTRAP   | 0.049              | 0.0007    | 0.050             | 0.001 | 13.86         |
| 2            | R460H         | MTRAP   | 0.051              | 0.0003    |                   |       |               |
| 1            | E473V         | MTRAP   | 0.056              | 0.0007    | 0.055             | 0.001 | 12.60         |
| 2            | E473V         | MTRAP   | 0.054              | 0.0004    |                   |       |               |
| 1            | R474L         | MTRAP   | 0.046              | 0.0006    | 0.052             | 0.008 | 13.46         |
| 2            | R474L         | MTRAP   | 0.057              | 0.0003    |                   |       |               |
| 1            | R475T         | MTRAP   | 0.059              | 0.0014    | 0.056             | 0.004 | 12.38         |
| 2            | R475T         | MTRAP   | 0.053              | 0.0004    |                   |       |               |
| 1            | Q530P         | MTRAP   | 0.05               | 0.0005    | 0.053             | 0.004 | 13.20         |
| 2            | Q530P         | MTRAP   | 0.055              | 0.0002    |                   |       |               |

**Table S3**
